# Supplementary material
Source: publisher figshare collection journal article supplement (https://frontiersin.figshare.com/ndownloader/files/35066611)
Supplement: Supplementary file [file 35066611]

## Supplementary Information

### **Electron flow from the inner membrane towards the cell exterior in *Geobacter sulfurreducens*: biochemical characterization of cytochrome CbcL**

Jorge M. A. Antunes<sup>1,2</sup>, Marta A. Silva<sup>1,2</sup>, Carlos A. Salgueiro<sup>1,2,\*</sup>, Leonor Morgado<sup>1,2,\*</sup>

<sup>1</sup>Associate Laboratory i4HB - Institute for Health and Bioeconomy, NOVA School of Science and Technology, NOVA University Lisbon, 2829-516 Caparica, Portugal

<sup>2</sup>UCIBIO – Applied Molecular Biosciences Unit, Chemistry Department, NOVA School of Science and Technology, NOVA University Lisbon, 2829-516 Caparica, Portugal

\*Corresponding authors: csalgueiro@fct.unl.pt, mlmorgado@fct.unl.pt

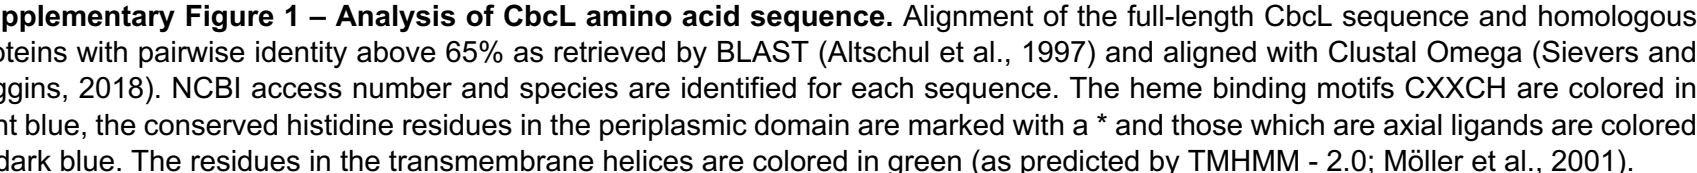

|                |                               |                                                 |     |     |     |     |     |     |                                           |     |     |     |     |
|----------------|-------------------------------|-------------------------------------------------|-----|-----|-----|-----|-----|-----|-------------------------------------------|-----|-----|-----|-----|
| WP_010940947.1 | Cbcl G. <i>sulfurreducens</i> | HAEEHHIPDGHKVVYRRFKRRHIFLHLHLVIFSLLLLSLGLPLKFS  | 340 | 350 | 360 | 370 | 380 | 390 | 400                                       | 410 | 420 | 430 | 440 |
| WP_214186053.1 | G. <i>hydrogenophilus</i>     | HEEH-HVDPDGHKVVYRRFKRRHIFLHLHLVIFSLLLLSLGLPLKFS |     |     |     |     |     |     | AGAGITFVYFVGSLSLSFHFVLRKDIKGNWLMRMFGPDSLM |     |     |     |     |
| WP_039744678.1 | G. <i>pickeringii</i>         | HAE-HHVDPDGHKVVYRRFKRRHIFLHLHLVIFSLLLLSLGLPLKFS |     |     |     |     |     |     | AGAGITFVYFVGSLSLSFHFVLRKDIKGNWLMRMFGPDSLM |     |     |     |     |
| WP_012648751.1 | G. <i>daltoni</i>             | HVG-HVVDAGHAYVRRFQRRHIFLHLHLVIFSLLLLSLGLPLKFS   |     |     |     |     |     |     | AGAGITFVYFVGSLSLSFHFVLRKDIKGNWLMRMFGPDSLM |     |     |     |     |
| WP_011937070.1 | G. <i>unsireducens</i>        | HL-HVVPDGHKQYRRFKRVHVFMLHLVIFSLGLSLTGLPLKFS     |     |     |     |     |     |     | AGAGITFVYFVGSLSLSFHFVLRKDIKGNWLMRMFGPDSLM |     |     |     |     |
| WP_214174069.1 | G. <i>luticola</i>            | HVP-HVVPFAHAQYRRFNRIHIFLHLHLVIFSLGLSLTGLPLKFS   |     |     |     |     |     |     | AGAGITFVYFVGSLSLSFHFVLRKDIKGNWLMRMFGPDSLM |     |     |     |     |
| WP_214172030.1 | Citri fermentans pelophilum   | HHHGPDCTEPHKQYRRFLKRVHVFMLHLVIFSLGLSLTGLPLKFS   |     |     |     |     |     |     | AGAGITFVYFVGSLSLSFHFVLRKDIKGNWLMRMFGPDSLM |     |     |     |     |
| WP_145018723.1 | G. <i>argilaceus</i>          | HVH-HEISEPHKQYRRFNRIHIFMHLVITSLGLSLTGLPLKFS     |     |     |     |     |     |     | AGAGITFVYFVGSLSLSFHFVLRKDIKGNWLMRMFGPDSLM |     |     |     |     |
| WP_214296274.1 | G. <i>chapelii</i>            | EH-HVMDPAHKQYRRFNRIHIFMHLVITSLGLSLTGLPLKFS      |     |     |     |     |     |     | AGAGITFVYFVGSLSLSFHFVLRKDIKGNWLMRMFGPDSLM |     |     |     |     |
| WP_129125245.1 | Geomonas oryzae               | IIL-HVVPFGHKQYRRFKRVHVFMLHLVIFSLGLSLTGLPLKFS    |     |     |     |     |     |     | AGAGITFVYFVGSLSLSFHFVLRKDIKGNWLMRMFGPDSLM |     |     |     |     |
| WP_136515374.1 | Geomonas edaphica             | IIM-HVVPFGHKQYRRFKRVHVFMLHLVIFSLGLSLTGLPLKFS    |     |     |     |     |     |     | AGAGITFVYFVGSLSLSFHFVLRKDIKGNWLMRMFGPDSLM |     |     |     |     |
| WP_135868807.1 | Geomonas terrae               | IIM-HVVPFGHKQYRRFKRVHVFMLHLVIFSLGLSLTGLPLKFS    |     |     |     |     |     |     | AGAGITFVYFVGSLSLSFHFVLRKDIKGNWLMRMFGPDSLM |     |     |     |     |
| WP_183344566.1 | Geomonas paludis              | IIL-HVVPFGHKQYRRFKRVHVFMLHLVIFSLGLSLTGLPLKFS    |     |     |     |     |     |     | AGAGITFVYFVGSLSLSFHFVLRKDIKGNWLMRMFGPDSLM |     |     |     |     |
| WP_199387431.1 | Geomonas anaerohicana         | IIL-HVVPDGHKQYRRFKRVHVFMLHLVIFSLGLSLTGLPLKFS    |     |     |     |     |     |     | AGAGITFVYFVGSLSLSFHFVLRKDIKGNWLMRMFGPDSLM |     |     |     |     |
| WP_136524026.1 | Geomonas ferritducens         | IIM-HVVPFGHKQYRRFKRVHVFMLHLVIFSLGLSLTGLPLKFS    |     |     |     |     |     |     | AGAGITFVYFVGSLSLSFHFVLRKDIKGNWLMRMFGPDSLM |     |     |     |     |
| WP_199353493.1 | Geomonas propionica           | VIL-HVVPFGHKQYRRFKRVHVFMLHLVIFSLGLSLTGLPLKFS    |     |     |     |     |     |     | AGAGITFVYFVGSLSLSFHFVLRKDIKGNWLMRMFGPDSLM |     |     |     |     |
| WP_012528534.1 | Citri fermentans bemidjense   | VIL-HVVPFGHKQYRRFKRVHVFMLHLVIFSLGLSLTGLPLKFS    |     |     |     |     |     |     | AGAGITFVYFVGSLSLSFHFVLRKDIKGNWLMRMFGPDSLM |     |     |     |     |
| WP_185243778.1 | Citri fermentans bremense     | VIL-HVVPFGHKQYRRFKRVHVFMLHLVIFSLGLSLTGLPLKFS    |     |     |     |     |     |     | AGAGITFVYFVGSLSLSFHFVLRKDIKGNWLMRMFGPDSLM |     |     |     |     |
| WP_183360284.1 | Geomonas limicola             | HVL-HVVPFGHKQYRRFKRVHVFMLHLVIFSLGLSLTGLPLKFS    |     |     |     |     |     |     | AGAGITFVYFVGSLSLSFHFVLRKDIKGNWLMRMFGPDSLM |     |     |     |     |
| WP_133353646.1 | Geomonas silvestris           | HVL-HVVPFGHKQYRRFKRVHVFMLHLVIFSLGLSLTGLPLKFS    |     |     |     |     |     |     | AGAGITFVYFVGSLSLSFHFVLRKDIKGNWLMRMFGPDSLM |     |     |     |     |
| WP_151155206.1 | Oryzomonas sagensis           | EYH-HVVPFGHKQYRRFNRIHIFMHLVITSLGLSLTGLPLKFS     |     |     |     |     |     |     | AGAGITFVYFVGSLSLSFHFVLRKDIKGNWLMRMFGPDSLM |     |     |     |     |
| WP_151126363.1 | Oryzomonas japonica           | EYH-HVVPFAHKQYRRFNRIHIFMHLVITSLGLSLTGLPLKFS     |     |     |     |     |     |     | AGAGITFVYFVGSLSLSFHFVLRKDIKGNWLMRMFGPDSLM |     |     |     |     |
| WP_149307569.1 | Oryzomonas rubra              | EYH-HVVPFAHKQYRRFNRIHIFMHLVITSLGLSLTGLPLKFS     |     |     |     |     |     |     | AGAGITFVYFVGSLSLSFHFVLRKDIKGNWLMRMFGPDSLM |     |     |     |     |
| WP_199384493.1 | Geomesophilobacter sediminis  | AEV-HRIPDGNQYRRFNRRHVLMLHLVITSLGLSLTGLPLKFS     |     |     |     |     |     |     | AGAGITFVYFVGSLSLSFHFVLRKDIKGNWLMRMFGPDSLM |     |     |     |     |
| WP_092058298.1 | Desulfuromonas acetigenis     | GFV-OHIKDPHKMYRRFTKRHFVLFHLVIFSLGLSLTGLPLKFS    |     |     |     |     |     |     | AGAGITFVYFVGSLSLSFHFVLRKDIKGNWLMRMFGPDSLM |     |     |     |     |
| WP_199383611.1 | Geomesophilobacter sediminis  | HQL-HQVEEGHKQYRRFQPRHVFLLHLVIFSLGLSLTGLPLKFS    |     |     |     |     |     |     | AGAGITFVYFVGSLSLSFHFVLRKDIKGNWLMRMFGPDSLM |     |     |     |     |
| WP_040198653.1 | Geokaikabacter subterraneus   | DHV-HHIDPAHKYRRFTRRHIFLHLVIFSLGLSLTGLPLKFS      |     |     |     |     |     |     | AGAGITFVYFVGSLSLSFHFVLRKDIKGNWLMRMFGPDSLM |     |     |     |     |
| WP_053649256.1 | Desulfuromonas sudanensis     | RL-HVVPFGHKQYRRFQPRHVFLLHLVIFSLGLSLTGLPLKFS     |     |     |     |     |     |     | AGAGITFVYFVGSLSLSFHFVLRKDIKGNWLMRMFGPDSLM |     |     |     |     |
| WP_040095868.1 | Geokaikabacter ferritducens   | EVP-HHIDPAHKYRRFNRLHIFLHLVIFSLGLSLTGLPLKFS      |     |     |     |     |     |     | AGAGITFVYFVGSLSLSFHFVLRKDIKGNWLMRMFGPDSLM |     |     |     |     |
| WP_153304744.1 | G. <i>lovleyi</i>             | HV-HHIDEPHKLHYRRFKRRHIFLHLVITSLGLSLTGLPLKFS     |     |     |     |     |     |     | AGAGITFVYFVGSLSLSFHFVLRKDIKGNWLMRMFGPDSLM |     |     |     |     |
| WP_078790975.1 | G. <i>thiogenes</i>           | HV-HHIDEPHKLHYRRFKRRHIFLHLVITSLGLSLTGLPLKFS     |     |     |     |     |     |     | AGAGITFVYFVGSLSLSFHFVLRKDIKGNWLMRMFGPDSLM |     |     |     |     |
| WP_072908070.1 | Malonomonas rubra             | H-HVHIDEPHKLHYRRFKRRHIFLHLVITSLGLSLTGLPLKFS     |     |     |     |     |     |     | AGAGITFVYFVGSLSLSFHFVLRKDIKGNWLMRMFGPDSLM |     |     |     |     |
| WP_010940947.1 | Cbcl G. <i>sulfurreducens</i> | PNFRD IKDVAGMVRWF LFRGPKPTFERWYWEKDFIAVFWGMFA   | 450 | 460 | 470 | 480 | 490 | 500 | 510                                       | 520 | 530 | 540 | 550 |
| WP_214186053.1 | G. <i>hydrogenophilus</i>     | PNFRD IKDVAGMVRWF LFRGPKPTFERWYWEKDFIAVFWGMFA   |     |     |     |     |     |     | AGAGITFVYFVGSLSLSFHFVLRKDIKGNWLMRMFGPDSLM |     |     |     |     |
| WP_039744678.1 | G. <i>pickeringii</i>         | PNFRD IKDVAGMVRWF LFRGPKPTFERWYWEKDFIAVFWGMFA   |     |     |     |     |     |     | AGAGITFVYFVGSLSLSFHFVLRKDIKGNWLMRMFGPDSLM |     |     |     |     |
| WP_012648751.1 | G. <i>daltoni</i>             | PNFRD IKDVAGMVRWF LFRGPKPTFERWYWEKDFIAVFWGMFA   |     |     |     |     |     |     | AGAGITFVYFVGSLSLSFHFVLRKDIKGNWLMRMFGPDSLM |     |     |     |     |
| WP_011937070.1 | G. <i>unsireducens</i>        | PNFRD IKDVAGMVRWF LFRGPKPTFERWYWEKDFIAVFWGMFA   |     |     |     |     |     |     | AGAGITFVYFVGSLSLSFHFVLRKDIKGNWLMRMFGPDSLM |     |     |     |     |
| WP_214174069.1 | G. <i>luticola</i>            | PNFRD IKDVAGMVRWF LFRGPKPTFERWYWEKDFIAVFWGMFA   |     |     |     |     |     |     | AGAGITFVYFVGSLSLSFHFVLRKDIKGNWLMRMFGPDSLM |     |     |     |     |
| WP_214172030.1 | Citri fermentans pelophilum   | PNFRD IKDVAGMVRWF LFRGPKPTFERWYWEKDFIAVFWGMFA   |     |     |     |     |     |     | AGAGITFVYFVGSLSLSFHFVLRKDIKGNWLMRMFGPDSLM |     |     |     |     |
| WP_145018723.1 | G. <i>argilaceus</i>          | PNFRD IKDVAGMVRWF LFRGPKPTFERWYWEKDFIAVFWGMFA   |     |     |     |     |     |     | AGAGITFVYFVGSLSLSFHFVLRKDIKGNWLMRMFGPDSLM |     |     |     |     |
| WP_214296274.1 | G. <i>chapelii</i>            | PNFRD IKDVAGMVRWF LFRGPKPTFERWYWEKDFIAVFWGMFA   |     |     |     |     |     |     | AGAGITFVYFVGSLSLSFHFVLRKDIKGNWLMRMFGPDSLM |     |     |     |     |
| WP_129125245.1 | Geomonas oryzae               | PNFRD IKDVAGMVRWF LFRGPKPTFERWYWEKDFIAVFWGMFA   |     |     |     |     |     |     | AGAGITFVYFVGSLSLSFHFVLRKDIKGNWLMRMFGPDSLM |     |     |     |     |
| WP_136515374.1 | Geomonas edaphica             | PNFRD IKDVAGMVRWF LFRGPKPTFERWYWEKDFIAVFWGMFA   |     |     |     |     |     |     | AGAGITFVYFVGSLSLSFHFVLRKDIKGNWLMRMFGPDSLM |     |     |     |     |
| WP_135868807.1 | Geomonas terrae               | PNFRD IKDVAGMVRWF LFRGPKPTFERWYWEKDFIAVFWGMFA   |     |     |     |     |     |     | AGAGITFVYFVGSLSLSFHFVLRKDIKGNWLMRMFGPDSLM |     |     |     |     |
| WP_183344566.1 | Geomonas paludis              | PNFRD IKDVAGMVRWF LFRGPKPTFERWYWEKDFIAVFWGMFA   |     |     |     |     |     |     | AGAGITFVYFVGSLSLSFHFVLRKDIKGNWLMRMFGPDSLM |     |     |     |     |
| WP_199387431.1 | Geomonas anaerohicana         | PNFRD IKDVAGMVRWF LFRGPKPTFERWYWEKDFIAVFWGMFA   |     |     |     |     |     |     | AGAGITFVYFVGSLSLSFHFVLRKDIKGNWLMRMFGPDSLM |     |     |     |     |
| WP_136524026.1 | Geomonas ferritducens         | PNFRD IKDVAGMVRWF LFRGPKPTFERWYWEKDFIAVFWGMFA   |     |     |     |     |     |     | AGAGITFVYFVGSLSLSFHFVLRKDIKGNWLMRMFGPDSLM |     |     |     |     |
| WP_199353493.1 | Geomonas propionica           | PNFRD IKDVAGMVRWF LFRGPKPTFERWYWEKDFIAVFWGMFA   |     |     |     |     |     |     | AGAGITFVYFVGSLSLSFHFVLRKDIKGNWLMRMFGPDSLM |     |     |     |     |
| WP_012528534.1 | Citri fermentans bemidjense   | PNFRD IKDVAGMVRWF LFRGPKPTFERWYWEKDFIAVFWGMFA   |     |     |     |     |     |     | AGAGITFVYFVGSLSLSFHFVLRKDIKGNWLMRMFGPDSLM |     |     |     |     |
| WP_185243778.1 | Citri fermentans bremense     | PNFRD IKDVAGMVRWF LFRGPKPTFERWYWEKDFIAVFWGMFA   |     |     |     |     |     |     | AGAGITFVYFVGSLSLSFHFVLRKDIKGNWLMRMFGPDSLM |     |     |     |     |
| WP_183360284.1 | Geomonas limicola             | PNFRD IKDVAGMVRWF LFRGPKPTFERWYWEKDFIAVFWGMFA   |     |     |     |     |     |     | AGAGITFVYFVGSLSLSFHFVLRKDIKGNWLMRMFGPDSLM |     |     |     |     |
| WP_133353646.1 | Geomonas silvestris           | PNFRD IKDVAGMVRWF LFRGPKPTFERWYWEKDFIAVFWGMFA   |     |     |     |     |     |     | AGAGITFVYFVGSLSLSFHFVLRKDIKGNWLMRMFGPDSLM |     |     |     |     |
| WP_151155206.1 | Oryzomonas sagensis           | PNFRD IKDVAGMVRWF LFRGPKPTFERWYWEKDFIAVFWGMFA   |     |     |     |     |     |     | AGAGITFVYFVGSLSLSFHFVLRKDIKGNWLMRMFGPDSLM |     |     |     |     |
| WP_151126363.1 | Oryzomonas japonica           | PNFRD IKDVAGMVRWF LFRGPKPTFERWYWEKDFIAVFWGMFA   |     |     |     |     |     |     | AGAGITFVYFVGSLSLSFHFVLRKDIKGNWLMRMFGPDSLM |     |     |     |     |
| WP_149307569.1 | Oryzomonas rubra              | PNFRD IKDVAGMVRWF LFRGPKPTFERWYWEKDFIAVFWGMFA   |     |     |     |     |     |     | AGAGITFVYFVGSLSLSFHFVLRKDIKGNWLMRMFGPDSLM |     |     |     |     |
| WP_199384493.1 | Geomesophilobacter sediminis  | PNFRD IKDVAGMVRWF LFRGPKPTFERWYWEKDFIAVFWGMFA   |     |     |     |     |     |     | AGAGITFVYFVGSLSLSFHFVLRKDIKGNWLMRMFGPDSLM |     |     |     |     |
| WP_092058298.1 | Desulfuromonas acetigenis     | PNFRD IKDVAGMVRWF LFRGPKPTFERWYWEKDFIAVFWGMFA   |     |     |     |     |     |     | AGAGITFVYFVGSLSLSFHFVLRKDIKGNWLMRMFGPDSLM |     |     |     |     |
| WP_199383611.1 | Geomesophilobacter sediminis  | PNFRD IKDVAGMVRWF LFRGPKPTFERWYWEKDFIAVFWGMFA   |     |     |     |     |     |     | AGAGITFVYFVGSLSLSFHFVLRKDIKGNWLMRMFGPDSLM |     |     |     |     |
| WP_040198653.1 | Geokaikabacter subterraneus   | PNFRD IKDVAGMVRWF LFRGPKPTFERWYWEKDFIAVFWGMFA   |     |     |     |     |     |     | AGAGITFVYFVGSLSLSFHFVLRKDIKGNWLMRMFGPDSLM |     |     |     |     |
| WP_053649256.1 | Desulfuromonas sudanensis     | PNFRD IKDVAGMVRWF LFRGPKPTFERWYWEKDFIAVFWGMFA   |     |     |     |     |     |     | AGAGITFVYFVGSLSLSFHFVLRKDIKGNWLMRMFGPDSLM |     |     |     |     |
| WP_040095868.1 | Geokaikabacter ferritducens   | PNFRD IKDVAGMVRWF LFRGPKPTFERWYWEKDFIAVFWGMFA   |     |     |     |     |     |     | AGAGITFVYFVGSLSLSFHFVLRKDIKGNWLMRMFGPDSLM |     |     |     |     |
| WP_153304744.1 | G. <i>lovleyi</i>             | PNFRD IKDVAGMVRWF LFRGPKPTFERWYWEKDFIAVFWGMFA   |     |     |     |     |     |     | AGAGITFVYFVGSLSLSFHFVLRKDIKGNWLMRMFGPDSLM |     |     |     |     |
| WP_078790975.1 | G. <i>thiogenes</i>           | PNFRD IKDVAGMVRWF LFRGPKPTFERWYWEKDFIAVFWGMFA   |     |     |     |     |     |     | AGAGITFVYFVGSLSLSFHFVLRKDIKGNWLMRMFGPDSLM |     |     |     |     |
| WP_072908070.1 | Malonomonas rubra             | PNFRD IKDVAGMVRWF LFRGPKPTFERWYWEKDFIAVFWGMFA   |     |     |     |     |     |     | AGAGITFVYFVGSLSLSFHFVLRKDIKGNWLMRMFGPDSLM |     |     |     |     |
| WP_010940947.1 | Cbcl G. <i>sulfurreducens</i> | QMPKHEFIEERGDQWKRYEELGITEFAAKKTSQGVYDFIVKAFGFC  | 560 | 570 | 580 | 590 | 600 | 610 | 619                                       |     |     |     |     |
| WP_214186053.1 | G. <i>hydrogenophilus</i>     | QMPKHEFIEERGDQWKRYEELGITEFAAKKTSQGVYDFIVKAFGFC  |     |     |     |     |     |     | AGAGITFVYFVGSLSLSFHFVLRKDIKGNWLMRMFGPDSLM |     |     |     |     |
| WP_039744678.1 | G. <i>pickeringii</i>         | QMPKHEFIEERGDQWKRYEELGITEFAAKKTSQGVYDFIVKAFGFC  |     |     |     |     |     |     | AGAGITFVYFVGSLSLSFHFVLRKDIKGNWLMRMFGPDSLM |     |     |     |     |
| WP_012648751.1 | G. <i>daltoni</i>             | QMPKHEFIEERGDQWKRYEELGITEFAAKKTSQGVYDFIVKAFGFC  |     |     |     |     |     |     | AGAGITFVYFVGSLSLSFHFVLRKDIKGNWLMRMFGPDSLM |     |     |     |     |
| WP_011937070.1 | G. <i>unsireducens</i>        | QMPKHEFIEERGDQWKRYEELGITEFAAKKTSQGVYDFIVKAFGFC  |     |     |     |     |     |     | AGAGITFVYFVGSLSLSFHFVLRKDIKGNWLMRMFGPDSLM |     |     |     |     |
| WP_214174069.1 | G. <i>luticola</i>            | QMPKHEFIEERGDQWKRYEELGITEFAAKKTSQGVYDFIVKAFGFC  |     |     |     |     |     |     | AGAGITFVYFVGSLSLSFHFVLRKDIKGNWLMRMFGPDSLM |     |     |     |     |
| WP_214172030.1 | Citri fermentans pelophilum   | QMPKHEFIEERGDQWKRYEELGITEFAAKKTSQGVYDFIVKAFGFC  |     |     |     |     |     |     | AGAGITFVYFVGSLSLSFHFVLRKDIKGNWLMRMFGPDSLM |     |     |     |     |
| WP_145018723.1 | G. <i>argilaceus</i>          | QMPKHEFIEERGDQWKRYEELGITEFAAKKTSQGVYDFIVKAFGFC  |     |     |     |     |     |     | AGAGITFVYFVGSLSLSFHFVLRKDIKGNWLMRMFGPDSLM |     |     |     |     |
| WP_214296274.1 | G. <i>chapelii</i>            | QMPKHEFIEERGDQWKRYEELGITEFAAKKTSQGVYDFIVKAFGFC  |     |     |     |     |     |     | AGAGITFVYFVGSLSLSFHFVLRKDIKGNWLMRMFGPDSLM |     |     |     |     |
| WP_129125245.1 | Geomonas oryzae               | QMPKHEFIEERGDQWKRYEELGITEFAAKKTSQGVYDFIVKAFGFC  |     |     |     |     |     |     | AGAGITFVYFVGSLSLSFHFVLRKDIKGNWLMRMFGPDSLM |     |     |     |     |
| WP_136515374.1 | Geomonas edaphica             | QMPKHEFIEERGDQWKRYEELGITEFAAKKTSQGVYDFIVKAFGFC  |     |     |     |     |     |     | AGAGITFVYFVGSLSLSFHFVLRKDIKGNWLMRMFGPDSLM |     |     |     |     |
| WP_135868807.1 | Geomonas terrae               | QMPKHEFIEERGDQWKRYEELGITEFAAKKTSQGVYDFIVKAFGFC  |     |     |     |     |     |     | AGAGITFVYFVGSLSLSFHFVLRKDIKGNWLMRMFGPDSLM |     |     |     |     |
| WP_183344566.1 | Geomonas paludis              | QMPKHEFIEERGDQWKRYEELGITEFAAKKTSQGVYDFIVKAFGFC  |     |     |     |     |     |     | AGAGITFVYFVGSLSLSFHFVLRKDIKGNWLMRMFGPDSLM |     |     |     |     |
| WP_199387431.1 | Geomonas anaerohicana         | QMPKHEFIEERGDQWKRYEELGITEFAAKKTSQGVYDFIVKAFGFC  |     |     |     |     |     |     | AGAGITFVYFVGSLSLSFHFVLRKDIKGNWLMRMFGPDSLM |     |     |     |     |
| WP_136524026.1 | Geomonas ferritducens         | QMPKHEFIEERGDQWKRYEELGITEFAAKKTSQGVYDFIVKAFGFC  |     |     |     |     |     |     | AGAGITFVYFVGSLSLSFHFVLRKDIKGNWLMRMFGPDSLM |     |     |     |     |
| WP_199353493.1 | Geomonas propionica           | QMPKHEFIEERGDQWKRYEELGITEFAAKKTSQGVYDFIVKAFGFC  |     |     |     |     |     |     | AGAGITFVYFVGSLSLSFHFVLRKDIKGNWLMRMFGPDSLM |     |     |     |     |
| WP_012528534.1 | Citri fermentans bemidjense   | QMPKHEFIEERGDQWKRYEELGITEFAAKKTSQGVYDFIVKAFGFC  |     |     |     |     |     |     | AGAGITFVYFVGSLSLSFHFVLRKDIKGNWLMRMFGPDSLM |     |     |     |     |
| WP_185243778.1 | Citri fermentans bremense     | QMPKHEFIEERGDQWKRYEELGITEFAAKKTSQGVYDFIVKAFGFC  |     |     |     |     |     |     | AGAGITFVYFVGSLSLSFHFVLRKDIKGNWLMRMFGPDSLM |     |     |     |     |
| WP_183360284.1 | Geomonas limicola             | QMPKHEFIEERGDQWKRYEELGITEFAAKKTSQGVYDFIVKAFGFC  |     |     |     |     |     |     | AGAGITFVYFVGSLSLSFHFVLRKDIKGNWLMRMFGPDSLM |     |     |     |     |
| WP_133353646.1 | Geomonas silvestris           | QMPKHEFIEERGDQWKRYEELGITEFAAKKTSQGVYDFIVKAFGFC  |     |     |     |     |     |     | AGAGITFVYFVGSLSLSFHFVLRKDIKGNWLMRMFGPDSLM |     |     |     |     |
| WP_151155206.1 | Oryzomonas sagensis           | QMPKHEFIEERGDQWKRYEELGITEFAAKKTSQGVYDFIVKAFGFC  |     |     |     |     |     |     | AGAGITFVYFVGSLSLSFHFVLRKDIKGNWLMRMFGPDSLM |     |     |     |     |
| WP_151126363.1 | Oryzomonas japonica           | QMPKHEFIEERGDQWKRYEELGITEFAAKKTSQGVYDFIVKAFGFC  |     |     |     |     |     |     | AGAGITFVYFVGSLSLSFHFVLRKDIKGNWLMRMFGPDSLM |     |     |     |     |
| WP_149307569.1 | Oryzomonas rubra              | QMPKHEFIEERGDQWKRYEELGITEFAAKKTSQGVYDFIVKAFGFC  |     |     |     |     |     |     | AGAGITFVYFVGSLSLSFHFVLRKDIKGNWLMRMFGPDSLM |     |     |     |     |
| WP_199384493.1 | Geomesophilobacter sediminis  | QMPKHEFIEERGDQWKRYEELGITEFAAKKTSQGVYDFIVKAFGFC  |     |     |     |     |     |     | AGAGITFVYFVGSLSLSFHFVLRKDIKGNWLMRMFGPDSLM |     |     |     |     |
| WP_092058298.1 | Desulfuromonas acetigenis     | QMPKHEFIEERGDQWKRYEELGITEFAAKKTSQGVYDFIVKAFGFC  |     |     |     |     |     |     | AGAGITFVYFVGSLSLSFHFVLRKDIKGNWLMRM        |     |     |     |     |

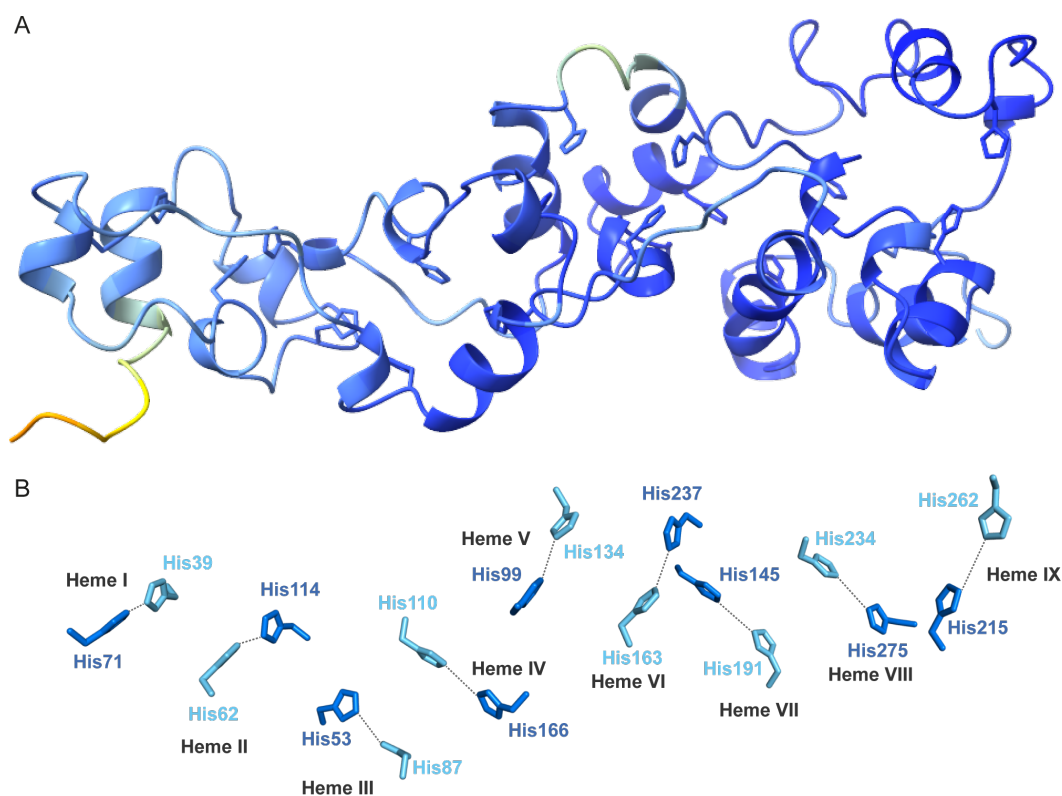

**Supplementary Figure 2 – AlphaFold prediction of CbcL periplasmic domain structure** (Jumper et al., 2021). (A) Structural model in cartoon representation colored by prediction confidence (B-factor). (B) Heme axial ligands. Histidine residues from the heme binding motifs CXXCH are colored in light blue (proximal ligands) and distal ligands in dark blue.



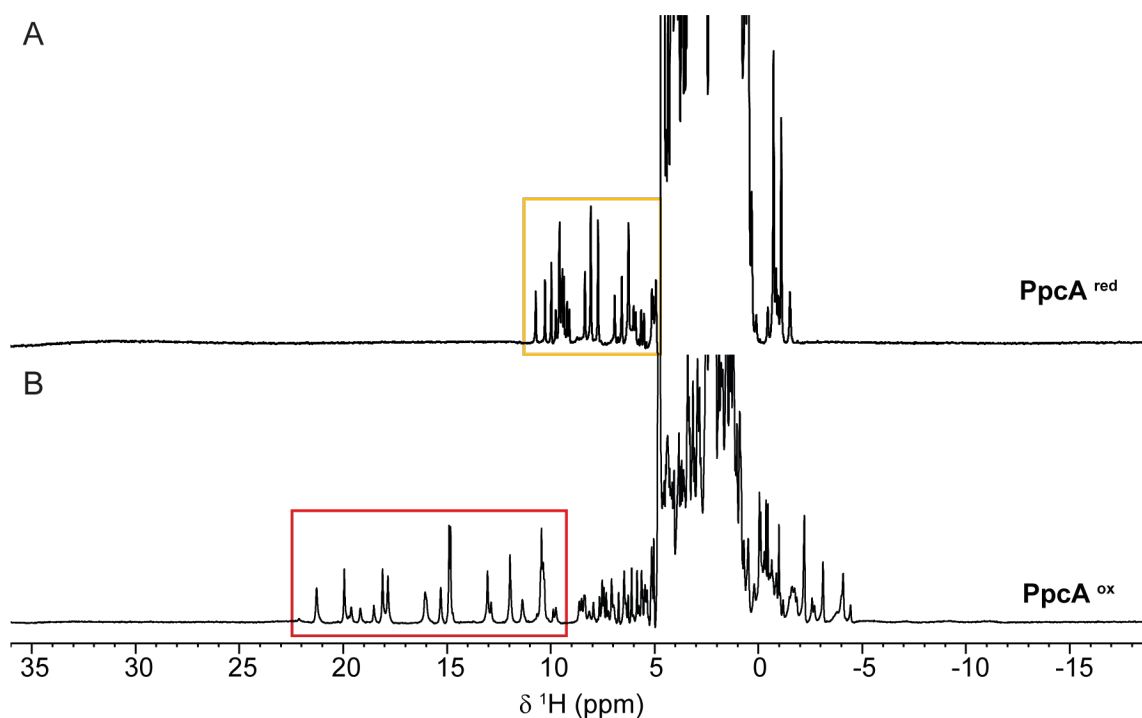

**Supplementary Figure 3 – 1D  $^1\text{H}$  NMR spectrum of cytochrome PpcA in the reduced (A) and oxidized (B) forms.** Spectra were acquired at 25 °C with 100  $\mu\text{M}$  of PpcA in 10 mM sodium phosphate pH 8. The yellow and red rectangles highlight the PpcA fingerprints in the reduced and oxidized states, respectively.

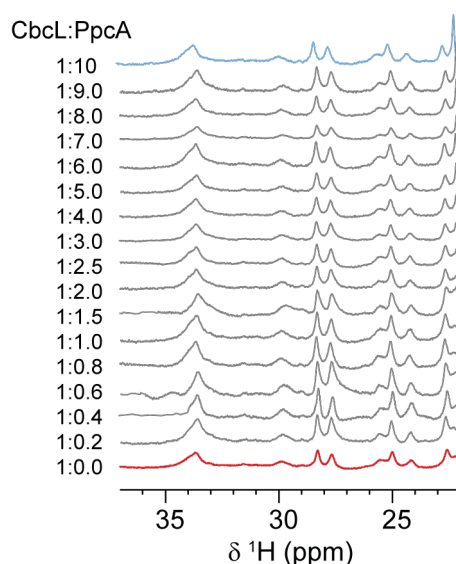

**Supplementary Figure 4 – NMR chemical shift perturbation experiments of CbcL in the presence of PpcA.** 1D  $^1\text{H}$  NMR spectra of CbcL acquired with increasing amounts of PpcA (ratio CbcL:PpcA indicated on the left side of each spectrum). Spectra were acquired at 25 °C with 100  $\mu\text{M}$  of CbcL in 10 mM sodium phosphate pH 8.

## References

- Altschul, S. F., Madden, T. L., Schäffer, A. A., Zhang, J., Zhang, Z., Miller, W., et al. (1997). Gapped BLAST and PSI-BLAST: A new generation of protein database search programs. *Nucleic Acids Res.* 25, 3389–3402. doi:10.1093/nar/25.17.3389.
- Jumper, J., Evans, R., Pritzel, A., Green, T., Figurnov, M., Ronneberger, O., et al. (2021). Highly accurate protein structure prediction with AlphaFold. *Nature* 596, 583–589. doi:10.1038/s41586-021-03819-2.
- Möller, S., Croning, M. D. R., and Apweiler, R. (2001). Evaluation of methods for the prediction of membrane spanning regions. *Bioinformatics* 17, 646–653. doi:10.1093/BIOINFORMATICS/17.7.646.
- Sievers, F., and Higgins, D. G. (2018). Clustal Omega for making accurate alignments of many protein sequences. *Protein Sci.* 27, 135–145. doi:10.1002/pro.3290.
